# Supplementary material for: Protecting healthcare workers and patients during the COVID-19 pandemic: a comparison of baseline and follow-up infection prevention and control needs in Nigerian military healthcare facilities delivering HIV services
Source: Springer Nature journal article supplement (doi:10.1186/s12913-023-10289-x), 2023-11-14
Supplement: MOESM1 [file 26302482]

Additional file 1: Color-coded and scored results of infection prevention and control components overall and by facility at baseline and follow-up.

| Component description                                           | Facility 1 |           | Facility 2 |           | Facility 3 |           | Facility 4 |           | All Facilities (n=4) |           |
|-----------------------------------------------------------------|------------|-----------|------------|-----------|------------|-----------|------------|-----------|----------------------|-----------|
|                                                                 | Baseline   | Follow-Up | Baseline   | Follow-Up | Baseline   | Follow-Up | Baseline   | Follow-Up | Baseline             | Follow-Up |
| Leadership                                                      | 78.6%      | 85.7%     | 92.9%      | 71.4%     | 92.9%      | 28.6%     | 92.9%      | 57.1%     | 89.3%                | 60.7%     |
| IPC policies, guidelines and Standard Operating Procedures      | 93.3%      | 100.0%    | 100.0%     | 100.0%    | 100.0%     | 86.7%     | 93.3%      | 100.0%    | 96.7%                | 96.7%     |
| Infrastructure                                                  | 66.7%      | 66.7%     | 50.0%      | 66.7%     | 58.3%      | 50.0%     | 50.0%      | 50.0%     | 56.3%                | 58.3%     |
| Triage and screening                                            | 60.0%      | 60.0%     | 86.7%      | 66.7%     | 80.0%      | 80.0%     | 66.7%      | 86.7%     | 73.3%                | 73.3%     |
| Training, knowledge and practice                                | 100.0%     | 100.0%    | 80.0%      | 40.0%     | 100.0%     | 60.0%     | 60.0%      | 80.0%     | 85.0%                | 70.0%     |
| Personal protective equipment materials availability & adequacy | 77.8%      | 100.0%    | 69.4%      | 100.0%    | 72.2%      | 55.6%     | 100.0%     | 100.0%    | 79.9%                | 88.9%     |
| Biosafety and waste management                                  | 100.0%     | 100.0%    | 100.0%     | 75.0%     | 100.0%     | 75.0%     | 100.0%     | 100.0%    | 100.0%               | 87.5%     |
| Monitoring and remediation                                      | 0.0%       | 0.0%      | 80.0%      | 80.0%     | 100.0%     | 100.0%    | 70.0%      | 100.0%    | 62.5%                | 70.0%     |
| Overall Facility Performance                                    | 74.0%      | 81.3%     | 82.7%      | 81.3%     | 85.3%      | 68.0%     | 82.7%      | 88.0%     | 81.2%                | 79.7%     |

|     |       |        |        |         |
|-----|-------|--------|--------|---------|
| Key |       |        |        |         |
|     | 0-25% | 26-50% | 51-75% | 76-100% |
